# Supplementary material
Source: Springer Nature journal article supplement (https://www.springermedizin.de/resource/supplementary/13058_2011_2965_MOESM9_ESM.pdf/9702894)

A.

MIR215; P=0.094

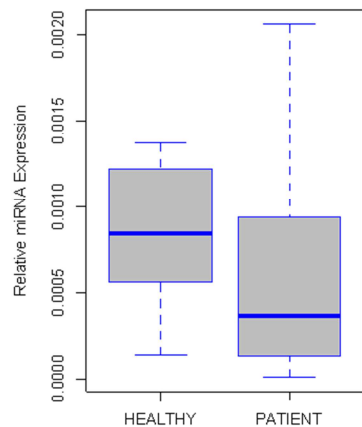

B.

MIR299-5P; P=0.019

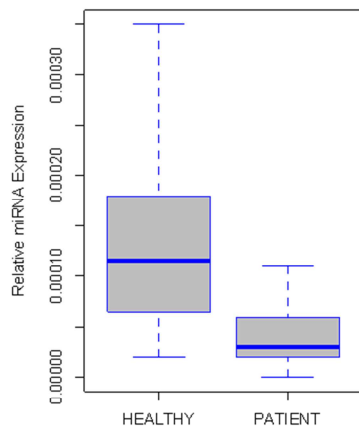

C.

MIR452; P=0.092

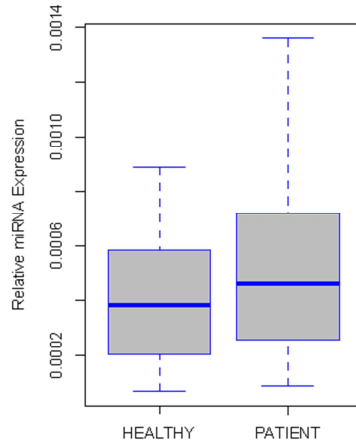

D.

MIR411; P=0.002

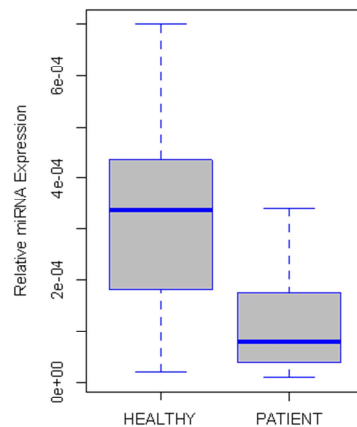

E.

MIR215; P=0.006

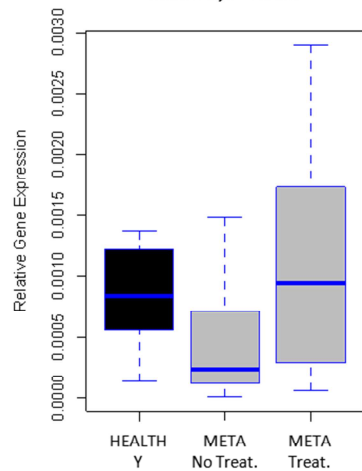

F.

MIR299-5P; P&lt;0.0001

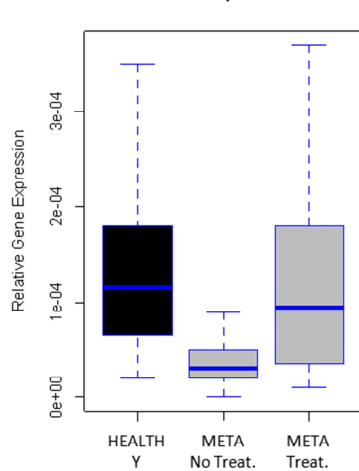

G.

MIR452; P=0.336

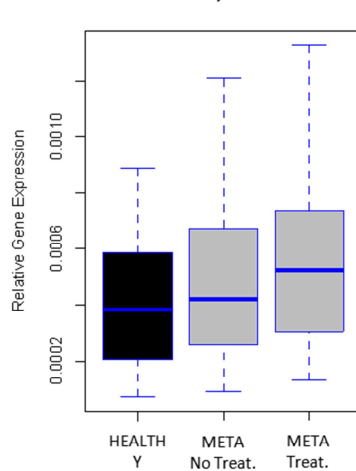

H.

MIR411; P&lt;0.0001

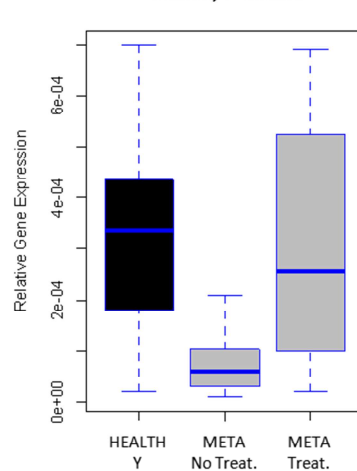

Supplement: MOESM9 [file 9702894]
